# Supplementary material for: Invading and Expanding: Range Dynamics and Ecological Consequences of the Greater White-Toothed Shrew (Crocidura russula) Invasion in Ireland
Source: PLoS One. 2014 Jun 23;9(6):e100403. doi: 10.1371/journal.pone.0100403 (PMC4067332; doi:10.1371/journal.pone.0100403)
Supplement: Table S2 — The abundances of the four small mammal species captured during live-trapping in 2012 and 2013. The number of individuals caught per trap in each locality. The associated number of traps (NumTraps), lunar phase for 2012 (Lunar) and whether or not it rained during the trapping session for 2012 (Rain) at each locality. (XLSX) [file pone.0100403.s009.xlsx]

## Sheet: GWTS_TrappingData_Allan2012.csv
Day	Month	Year	Irish Grid Ref	Lat	Long	C. russula	A. sylvaticus	M. glareolus	S. minutus	NumTrap	Lunar	Rain
28	May	2012	S0338518014	52.3142	-7.95109	13	7	12	0	77	41	Dry
29	May	2012	S0298117843	52.3127	-7.95702	6	1	2	0	112	52	Dry
30	May	2012	R9845602226	52.1723	-8.0233	7	5	4	2	109	63	Wet
31	May	2012	W9835598094	52.1352	-8.02475	0	1	8	0	80	73	Wet
31	May	2012	W9361598943	52.1428	-8.09399	0	3	1	2	29	73	Wet
1	June	2012	W9488492374	52.0838	-8.07536	0	0	2	0	69	83	Dry
1	June	2012	W9662091721	52.0779	-8.05003	0	0	0	1	40	83	Dry
2	June	2012	R7283305126	52.1977	-8.39804	0	1	6	4	69	91	Dry
2	June	2012	R7182903022	52.1788	-8.41255	0	0	4	2	40	91	Dry
22	June	2012	S1447300428	52.156	-7.78926	0	0	3	1	55	6	Wet
22	June	2012	S1755004117	52.1891	-7.74411	0	1	6	1	54	6	Wet
23	June	2012	S1502016820	52.3033	-7.78054	9	0	9	0	54	11	Wet
23	June	2012	S1109016080	52.2967	-7.83818	7	0	5	0	55	11	Wet
24	June	2012	S2603413051	52.269	-7.61938	0	0	0	1	54	19	Dry
24	June	2012	S2330112071	52.2603	-7.65948	0	0	2	0	55	19	Dry
25	June	2012	S2706725821	52.3837	-7.60322	21	1	11	0	55	27	Dry
25	June	2012	S2267925859	52.3843	-7.66766	9	0	7	0	54	27	Dry
10	July	2012	R8785704820	52.1955	-8.17831	8	2	5	0	27	61	Wet
10	July	2012	R8760418039	52.3143	-8.18249	6	0	6	0	28	61	Wet
10	July	2012	R8668813793	52.2761	-8.19576	7	0	5	0	27	61	Wet
10	July	2012	R9564501582	52.1665	-8.06437	0	0	0	1	27	61	Wet
11	July	2012	R7502713843	52.2762	-8.3666	9	0	6	0	36	51	Wet
11	July	2012	R7268021574	52.3455	-8.40161	8	0	3	0	36	51	Wet
11	July	2012	R6771833247	52.4502	-8.47554	8	0	3	0	35	51	Wet
12	July	2012	R5501327412	52.3968	-8.66161	0	0	3	0	36	41	Wet
12	July	2012	R5725112185	52.2602	-8.6268	1	0	10	4	36	41	Wet
13	July	2012	R4764711414	52.2524	-8.76732	0	0	4	3	26	32	Wet
13	July	2012	R4523504422	52.1894	-8.80151	0	0	0	1	27	32	Wet
13	July	2012	R5733105021	52.1958	-8.62473	6	0	3	0	27	32	Wet
13	July	2012	R6225501610	52.1655	-8.55234	5	0	1	2	27	32	Wet
26	July	2012	W8612993999	52.0982	-8.20314	0	0	0	3	27	46	Wet
26	July	2012	W7439995958	52.1154	-8.37445	0	0	0	6	27	46	Wet
26	July	2012	W6674396666	52.1214	-8.48627	0	0	0	2	27	46	Wet
26	July	2012	W5743391699	52.0761	-8.62157	0	0	1	2	26	46	Wet
27	July	2012	W4616796069	52.1144	-8.78656	0	2	3	5	27	57	Dry
27	July	2012	X0215095163	52.1089	-7.96935	0	0	1	5	27	57	Dry
27	July	2012	X1249296493	52.1207	-7.81835	0	1	1	4	27	57	Dry
28	July	2012	R4357029128	52.4112	-8.82999	0	0	0	2	27	68	Dry
28	July	2012	R4621336413	52.4769	-8.79233	0	0	0	3	27	68	Dry
28	July	2012	R5539935852	52.4727	-8.65707	0	1	3	3	27	68	Dry
28	July	2012	R6612525560	52.381	-8.49819	4	0	2	5	26	68	Dry
29	July	2012	R4641243633	52.5418	-8.79056	0	0	4	4	27	79	Dry
29	July	2012	R4198451371	52.6109	-8.85717	0	1	1	2	27	79	Dry
29	July	2012	R5240352658	52.6235	-8.70356	4	0	2	0	27	79	Dry
29	July	2012	R5126045576	52.5597	-8.7194	3	0	2	0	26	79	Dry
31	July	2012	S3639116697	52.3012	-7.46728	0	0	1	3	27	94	Wet
31	July	2012	S3386325901	52.3841	-7.50341	1	0	2	1	27	94	Wet
31	July	2012	S3455731721	52.4363	-7.49262	3	0	1	0	26	94	Wet
31	July	2012	S3369443795	52.5449	-7.50409	9	2	4	0	26	94	Wet
1	August	2012	S4495642740	52.5346	-7.33824	0	1	2	1	27	98	Wet
1	August	2012	S4355337954	52.4917	-7.35954	0	0	0	1	26	98	Wet
1	August	2012	S4666327470	52.3972	-7.31522	0	1	2	5	26	98	Wet
1	August	2012	S4588415786	52.2923	-7.32826	0	1	0	2	26	98	Wet
2	August	2012	S3740263134	52.7184	-7.44725	12	1	1	0	27	100	Dry
2	August	2012	S4612063655	52.7224	-7.31817	0	0	0	9	26	100	Dry
2	August	2012	S4516654147	52.6371	-7.33359	1	2	3	2	26	100	Dry
3	August	2012	S5143343731	52.5429	-7.24265	0	2	2	3	28	99	Dry
3	August	2012	S5691852656	52.6226	-7.16028	0	4	1	4	26	99	Dry
3	August	2012	S5317162130	52.7081	-7.21407	0	0	0	1	26	99	Dry
3	August	2012	S4313672480	52.802	-7.36117	4	2	4	3	25	99	Dry
4	August	2012	S5053770645	52.7848	-7.25173	0	4	1	6	27	96	Dry
4	August	2012	S5302982312	52.8894	-7.21291	0	1	3	3	26	96	Dry
4	August	2012	S4102686071	52.9242	-7.39074	0	1	3	4	26	96	Dry
7	August	2012	S3690776705	52.8404	-7.45304	10	2	2	0	27	76	Dry
7	August	2012	S3458685701	52.9214	-7.48653	2	2	2	4	26	76	Dry
7	August	2012	S2325884219	52.9087	-7.65505	9	0	3	0	26	76	Dry
7	August	2012	S2477475798	52.8329	-7.63316	6	0	5	0	25	76	Dry
8	August	2012	S4257592206	52.9792	-7.36691	0	0	0	3	26	67	Dry
8	August	2012	S3463392579	52.9832	-7.4851	0	1	3	4	26	67	Dry
8	August	2012	S2723692957	52.987	-7.59519	5	0	4	2	26	67	Dry
8	August	2012	S1604793226	52.9898	-7.76178	8	0	0	2	26	67	Dry
9	August	2012	N0789200965	53.0596	-7.88303	0	1	2	2	26	58	Dry
9	August	2012	N1550602283	53.0712	-7.7694	0	0	2	4	26	58	Dry
9	August	2012	N2023905094	53.0963	-7.69862	0	0	3	2	26	58	Dry
9	August	2012	N3702301968	53.0674	-7.44844	0	2	0	3	26	58	Dry
10	August	2012	M9268004155	53.0882	-8.10998	0	0	1	2	26	48	Dry
10	August	2012	R8400197734	53.0304	-8.2392	2	1	3	3	26	48	Dry
10	August	2012	R9737196558	53.02	-8.03991	8	1	4	2	26	48	Dry
10	August	2012	S0233794005	52.9971	-7.96593	3	2	4	6	26	48	Dry
11	August	2012	M8264907189	53.1153	-8.25986	0	0	1	2	26	39	Dry
11	August	2012	M7680802757	53.0752	-8.34677	0	2	1	2	26	39	Dry
11	August	2012	R7565694013	52.9966	-8.36329	0	0	1	1	26	39	Dry
11	August	2012	R7649789165	52.9531	-8.35042	0	0	0	1	26	39	Dry
12	August	2012	R6603586262	52.9264	-8.50576	0	3	0	1	26	30	Wet
12	August	2012	R6764871575	52.7946	-8.48032	0	0	0	2	26	30	Wet
12	August	2012	R6116667334	52.756	-8.5759	0	1	1	1	26	30	Wet
12	August	2012	R5300060397	52.6931	-8.69585	0	0	0	1	26	30	Wet
14	August	2012	S0148497297	53.0267	-7.97862	2	2	0	0	26	14	Dry
14	August	2012	N0270300428	53.0548	-7.96042	0	0	0	4	26	14	Dry
14	August	2012	S3612586500	52.9284	-7.46356	3	0	3	1	26	14	Dry
14	August	2012	S3788886140	52.9251	-7.43739	2	0	1	4	25	1	Dry
15	August	2012	S3771886000	52.9238	-7.43993	3	2	6	7	51	8	Wet
15	August	2012	S0216895009	53.0061	-7.96844	6	0	4	4	52	8	Wet
16	August	2012	S3633686135	52.9251	-7.46046	6	6	5	1	51	14	Wet
16	August	2012	S0244094803	53.0043	-7.96439	9	5	1	3	52	3	Wet
17	August	2012	S2464975734	52.8323	-7.63502	23	1	4	0	51	1	Wet
17	August	2012	S3628386181	52.9256	-7.46125	5	3	6	2	52	3	Wet
18	August	2012	S4695852793	52.6247	-7.30732	0	0	0	2	26	0	Dry
18	August	2012	S5013652172	52.6189	-7.26049	0	2	1	5	25	0	Dry
18	August	2012	S1675865693	52.7424	-7.75261	25	0	11	0	52	0	Dry
19	August	2012	S4404155095	52.6457	-7.35008	0	5	4	19	103	2	Dry
20	August	2012	S4483654173	52.6373	-7.33846	4	6	4	10	103	2	Dry
21	August	2012	S4013352657	52.6241	-7.40811	6	7	6	10	52	14	Dry
21	August	2012	S3154750939	52.6092	-7.53505	32	3	0	0	51	14	Dry
22	August	2012	S4110252939	52.6265	-7.39377	8	1	2	3	54	22	Dry
22	August	2012	S2050653304	52.631	-7.69788	18	5	21	0	77	22	Dry
23	August	2012	S0415868376	52.7668	-7.93913	27	8	10	0	52	32	Wet
23	August	2012	S0403084869	52.915	-7.94083	22	2	2	0	53	32	Wet
24	August	2012	R9006853894	52.6366	-8.14743	25	2	5	0	52	43	Wet
24	August	2012	R7467854542	52.6419	-8.3748	22	2	5	0	52	43	Wet
25	August	2012	S0321552022	52.6198	-7.95326	31	2	5	0	51	55	Dry
28	August	2012	S0167134965	52.4666	-7.97614	31	1	5	0	52	85	Dry
29	August	2012	R7264421885	52.3483	-8.40216	14	2	3	0	52	92	Dry
29	August	2012	R8715342453	52.5337	-8.19005	23	0	7	0	52	92	Dry
30	August	2012	R5240852661	52.6235	-8.70349	18	1	5	0	53	97	Wet
30	August	2012	R4923051736	52.6149	-8.75027	9	3	5	2	26	97	Wet
30	August	2012	R4502650733	52.6055	-8.81216	0	1	3	0	25	97	Wet
31	August	2012	R9841202422	52.1741	-8.02394	33	6	4	3	104	99	Dry
1	September	2012	R5576101136	52.1608	-8.64718	17	0	17	0	82	100	Dry
1	September	2012	R5386901238	52.1615	-8.67484	6	1	4	0	26	1	Dry
1	September	2012	W5111099015	52.1413	-8.71483	0	2	2	3	26	1	Dry
2	September	2012	R5389601200	52.1612	-8.67444	18	1	9	4	74	98	Dry
2	September	2012	R5095002069	52.1688	-8.71761	0	1	2	2	28	98	Dry
20	June	2013	R9841202422	52.1741	-8.02394	8	0	2	1	41	NA	NA
20	June	2013	W9835598094	52.1352	-8.02475	3	0	0	3	27	NA	NA
20	June	2013	W9361598943	52.1428	-8.09399	6	0	6	0	26	NA	NA
20	June	2013	W9808796240	52.1186	-8.02865	1	0	2	1	26	NA	NA
21	June	2013	W9503496797	52.1235	-8.07323	0	0	3	3	26	NA	NA
21	June	2013	W9364894866	52.1062	-8.09343	0	0	1	3	26	NA	NA
21	June	2013	W9536695188	52.1091	-8.06836	0	0	6	5	26	NA	NA
22	June	2013	R4502650733	52.6055	-8.81216	0	0	3	2	26	NA	NA
22	June	2013	S3639116697	52.3012	-7.46728	0	0	4	2	26	NA	NA
22	June	2013	R4261647818	52.579	-8.84723	0	0	1	1	26	NA	NA
22	June	2013	R4923051736	52.6149	-8.75027	7	0	6	2	26	NA	NA
22	June	2013	N0270300428	53.0548	-7.96042	1	0	0	1	26	NA	NA
23	June	2013	N0416902388	53.0724	-7.93854	0	0	3	0	26	NA	NA
23	June	2013	N0166302383	53.0724	-7.97592	0	0	0	0	26	NA	NA
23	June	2013	N0121204836	53.0944	-7.98264	0	0	0	1	26	NA	NA
23	June	2013	S0216895009	53.0061	-7.96844	12	0	2	0	26	NA	NA
23	June	2013	S4695852793	52.6247	-7.30732	1	0	1	0	26	NA	NA
24	June	2013	S5002150029	52.5996	-7.26251	0	0	0	2	26	NA	NA
24	June	2013	S4516654147	52.6371	-7.33359	6	2	3	0	26	NA	NA
24	June	2013	S5013652172	52.6189	-7.26049	0	0	0	3	26	NA	NA
